# Supplementary material
Source: PubMed Central journal article supplement (PMC9675879)
Supplement: NIHMS1809593-supplement-1.pdf [file NIHMS1809593-supplement-1.pdf]

**Table 1.** International Classification of Diseases 9th and 10th revision Clinical Modification (ICD-9-CM and ICD-10-CM) diagnosis codes for ocular and medical comorbidities.

| <b>Comorbidity</b>   | <b>ICD-9-CM codes</b>                                  | <b>ICD-10-CM codes</b> |
|----------------------|--------------------------------------------------------|------------------------|
| Macular degeneration | 362.51, 362.52, 362.50, 362.57                         | H35.31x, H35.32x       |
| Diabetic retinopathy | 362.01, 362.92, 362.03, 362.04, 362.05, 362.06, 362.07 | E10.3x, E11.3x         |
