# Supplementary material
Source: PubMed Central journal article supplement (PMC9675879)
Supplement: NIHMS1809593-supplement-2.pdf [file NIHMS1809593-supplement-2.pdf]

**Table 2.** Current Procedural Terminology 4th edition (CPT) codes considered to be incisional glaucoma surgery.

| <b>Surgery</b>                                 | <b>CPT code</b> |
|------------------------------------------------|-----------------|
| Sclerctomy                                     | 66160           |
| Trabeculectomy                                 | 66170, 66172    |
| Aqueous shunt to extraocular plate             | 66179, 66180    |
| Revision of aqueous shunt to extraocular plate | 66184, 66185    |
