# Supplementary material
Source: PubMed Central journal article supplement (PMC9675879)
Supplement: NIHMS1809593-supplement-3.pdf [file NIHMS1809593-supplement-3.pdf]

**Table 3.** Glaucoma medication types and National Drug Code numbers.

| <b>Glaucoma medication type</b> | <b>National Drug Code numbers</b>                                                                                                                                                                                                                                                                                                                                                                                                                                                                                                                                                                                                                                                                                                                            |
|---------------------------------|--------------------------------------------------------------------------------------------------------------------------------------------------------------------------------------------------------------------------------------------------------------------------------------------------------------------------------------------------------------------------------------------------------------------------------------------------------------------------------------------------------------------------------------------------------------------------------------------------------------------------------------------------------------------------------------------------------------------------------------------------------------|
| Alpha agonists                  | 0023-9177-05<br>0023-9177-10<br>0023-9177-15<br>0023-9321-03<br>0023-9321-05<br>0023-9321-10<br>0023-9321-15<br>0065-0660-10<br>0299-5980-00<br>0299-5980-02<br>0299-5980-30<br>0299-5980-35<br>0299-5980-45<br>14445-400-05<br>14445-400-10<br>14445-400-15<br>17478-715-10<br>17478-715-11<br>17478-715-12<br>17478-716-10<br>17478-716-11<br>24208-411-05<br>24208-411-10<br>24208-411-15<br>50090-1046-0<br>50090-1800-0<br>50090-4224-0<br>61314-143-05<br>61314-143-10<br>61314-143-15<br>61314-144-05<br>61314-144-10<br>61314-144-15<br>61314-665-05<br>61314-665-10<br>70069-231-01<br>70069-232-01<br>70069-233-01<br>0023-9211-03<br>0023-9211-05<br>0023-9211-10<br>0023-9211-15<br>0065-4147-25<br>0065-4147-27<br>0078-0904-38<br>0078-0904-98 |
| Beta blockers                   | 0023-9211-03<br>0023-9211-05<br>0023-9211-10                                                                                                                                                                                                                                                                                                                                                                                                                                                                                                                                                                                                                                                                                                                 |

|  |              |
|--|--------------|
|  | 0023-9211-15 |
|  | 0065-0246-10 |
|  | 0065-0246-15 |
|  | 0187-1496-05 |
|  | 0187-1496-99 |
|  | 0187-1498-25 |
|  | 0378-0055-01 |
|  | 0378-0221-01 |
|  | 0378-0715-01 |
|  | 10702-013-01 |
|  | 10702-014-01 |
|  | 13811-618-10 |
|  | 13811-620-10 |
|  | 17478-189-24 |
|  | 17478-288-10 |
|  | 17478-288-11 |
|  | 17478-288-12 |
|  | 17478-288-25 |
|  | 17478-289-10 |
|  | 17478-289-11 |
|  | 17478-289-12 |
|  | 17478-289-25 |
|  | 17478-365-05 |
|  | 17478-366-05 |
|  | 17478-366-10 |
|  | 17478-366-15 |
|  | 17478-705-10 |
|  | 17478-705-11 |
|  | 17478-705-12 |
|  | 17478-705-25 |
|  | 24208-004-01 |
|  | 24208-004-02 |
|  | 24208-004-03 |
|  | 24208-812-05 |
|  | 24208-813-05 |
|  | 24208-813-10 |
|  | 24208-814-25 |
|  | 24208-816-05 |
|  | 24208-818-25 |
|  | 24208-819-05 |
|  | 24658-700-01 |
|  | 24658-701-01 |
|  | 42806-038-01 |
|  | 42806-038-10 |
|  | 42806-039-01 |
|  | 42806-039-10 |
|  | 45865-121-01 |
|  | 50090-0558-0 |
|  | 50090-3441-0 |
|  | 50090-5091-0 |
|  | 50383-021-05 |

|              |
|--------------|
| 50383-021-10 |
| 50383-021-15 |
| 60429-753-01 |
| 60429-754-01 |
| 60505-1005-1 |
| 60505-1005-4 |
| 60758-801-05 |
| 60758-801-10 |
| 60758-802-05 |
| 60758-802-10 |
| 61314-224-05 |
| 61314-224-25 |
| 61314-225-05 |
| 61314-225-25 |
| 61314-226-05 |
| 61314-226-10 |
| 61314-226-15 |
| 61314-227-05 |
| 61314-227-10 |
| 61314-227-15 |
| 61314-245-01 |
| 61314-245-02 |
| 61314-245-03 |
| 62332-545-05 |
| 62332-546-05 |
| 63629-7167-1 |
| 63629-7167-2 |
| 63629-7167-3 |
| 63629-7167-4 |
| 64980-513-01 |
| 64980-513-05 |
| 64980-513-15 |
| 64980-514-01 |
| 64980-514-05 |
| 64980-514-15 |
| 67877-229-11 |
| 67877-229-15 |
| 67877-229-55 |
| 68682-045-25 |
| 68682-045-50 |
| 68682-812-05 |
| 68682-813-05 |
| 68682-813-10 |
| 70518-2353-0 |
| 76478-001-05 |
| 76478-001-10 |
| 76478-001-15 |
| 76478-002-05 |
| 76478-002-10 |
| 76478-002-12 |
| 76478-002-15 |

|                               |                                                                                                                                                                                                                                                                                                                                                                                                                                                              |
|-------------------------------|--------------------------------------------------------------------------------------------------------------------------------------------------------------------------------------------------------------------------------------------------------------------------------------------------------------------------------------------------------------------------------------------------------------------------------------------------------------|
|                               | 76519-1163-0<br>0527-1763-73<br>17478-514-11<br>17478-604-15<br>17478-604-30<br>17478-604-90<br>17478-605-10<br>24208-486-05<br>24208-486-10<br>42571-147-26<br>50090-1247-0<br>50383-233-05<br>50383-233-10<br>50383-261-61<br>50383-261-91<br>60429-115-10<br>61314-030-01<br>61314-030-02<br>65862-947-18<br>65862-947-60<br>69315-305-05<br>69315-305-10<br>70069-051-12                                                                                 |
| Carbonic anhydrase inhibitors | 0006-3519-36<br>0065-0275-10<br>0065-0275-15<br>0065-0275-25<br>0998-0203-15<br>0998-0204-15<br>0998-0206-15<br>17478-223-12<br>17478-224-12<br>17478-226-12<br>24208-485-10<br>42571-141-26<br>50090-1246-0<br>50090-5280-0<br>50383-232-05<br>50383-232-10<br>60219-1745-8<br>60219-1746-8<br>60219-1747-8<br>60429-114-10<br>61314-019-10<br>61314-203-15<br>61314-204-15<br>61314-206-15<br>62332-519-10<br>69238-1745-8<br>69238-1746-8<br>69238-1747-8 |

|                         |                                                                                                                                                                                                                                                                                                                                                                                                                                                                                                              |
|-------------------------|--------------------------------------------------------------------------------------------------------------------------------------------------------------------------------------------------------------------------------------------------------------------------------------------------------------------------------------------------------------------------------------------------------------------------------------------------------------------------------------------------------------|
|                         | 69315-304-05<br>69315-304-10<br>70069-181-01<br>70069-191-01<br>70069-201-01<br>0527-1763-73<br>17478-514-11<br>17478-604-15<br>17478-604-30<br>17478-604-90<br>17478-605-10<br>24208-486-05<br>24208-486-10<br>42571-147-26<br>50090-1247-0<br>50383-233-05<br>50383-233-10<br>50383-261-61<br>50383-261-91<br>60429-115-10<br>61314-030-01<br>61314-030-02<br>65862-947-18<br>65862-947-60<br>69315-305-05<br>69315-305-10<br>70069-051-12<br>0065-4147-25<br>0065-4147-27<br>0078-0904-38<br>0078-0904-98 |
| Prostaglandin analogues | 0013-8303-04<br>0023-3205-02<br>0023-3205-03<br>0023-3205-05<br>0023-3205-08<br>0065-0260-02<br>0065-0260-05<br>0065-0260-25<br>0078-0946-25<br>0078-0946-40<br>0078-0946-98<br>0378-9651-32<br>0378-9651-50<br>0781-6185-56<br>0781-6185-75<br>0781-6206-75<br>0781-6206-93<br>13985-610-02<br>17478-609-10<br>17478-609-30                                                                                                                                                                                 |

|              |
|--------------|
| 17478-609-90 |
| 17478-625-12 |
| 24208-463-25 |
| 47335-317-90 |
| 47335-317-92 |
| 47335-317-94 |
| 47335-317-98 |
| 50383-908-02 |
| 50383-908-05 |
| 50383-908-07 |
| 50383-912-03 |
| 50383-912-05 |
| 59762-0333-2 |
| 60505-0583-1 |
| 60505-0583-4 |
| 60505-0583-5 |
| 60505-0593-1 |
| 60505-0593-4 |
| 61314-547-01 |
| 61314-547-03 |
| 61919-112-25 |
| 62332-507-05 |
| 62332-507-25 |
| 62332-510-05 |
| 62332-510-25 |
| 62332-511-03 |
| 62332-511-05 |
| 64980-516-25 |
| 65862-872-25 |
| 68071-4612-2 |
| 68071-4650-2 |
| 68071-4893-2 |
| 68083-295-01 |
| 68083-296-01 |
| 68180-429-01 |
| 68180-429-02 |
| 68180-429-03 |
| 70069-401-01 |
| 70069-402-01 |
| 70069-403-01 |
| 70069-421-01 |
| 70069-421-03 |
| 71205-154-25 |
| 72266-139-01 |
| 72266-140-01 |
| 24208-504-01 |
| 24208-504-02 |
| 24208-504-05 |
| 24208-504-06 |
| 70727-529-25 |
| 70727-529-99 |

|                       |                                                              |
|-----------------------|--------------------------------------------------------------|
| Nitric oxide donators | 24208-504-01<br>24208-504-02<br>24208-504-05<br>24208-504-06 |
| Rho kinase inhibitors | 70727-497-25<br>70727-497-99<br>70727-529-25<br>70727-529-99 |
